# Supplementary material for: Antibacterial Activity of Terpenes and Terpenoids Present in Essential Oils
Source: PubMed Central journal article supplement (PMC6651100; doi:10.3390/molecules24132471), 2019-07-05
Supplement: molecules-24-02471-s001.pdf [file molecules-24-02471-s001.pdf]

## Supplementary Material

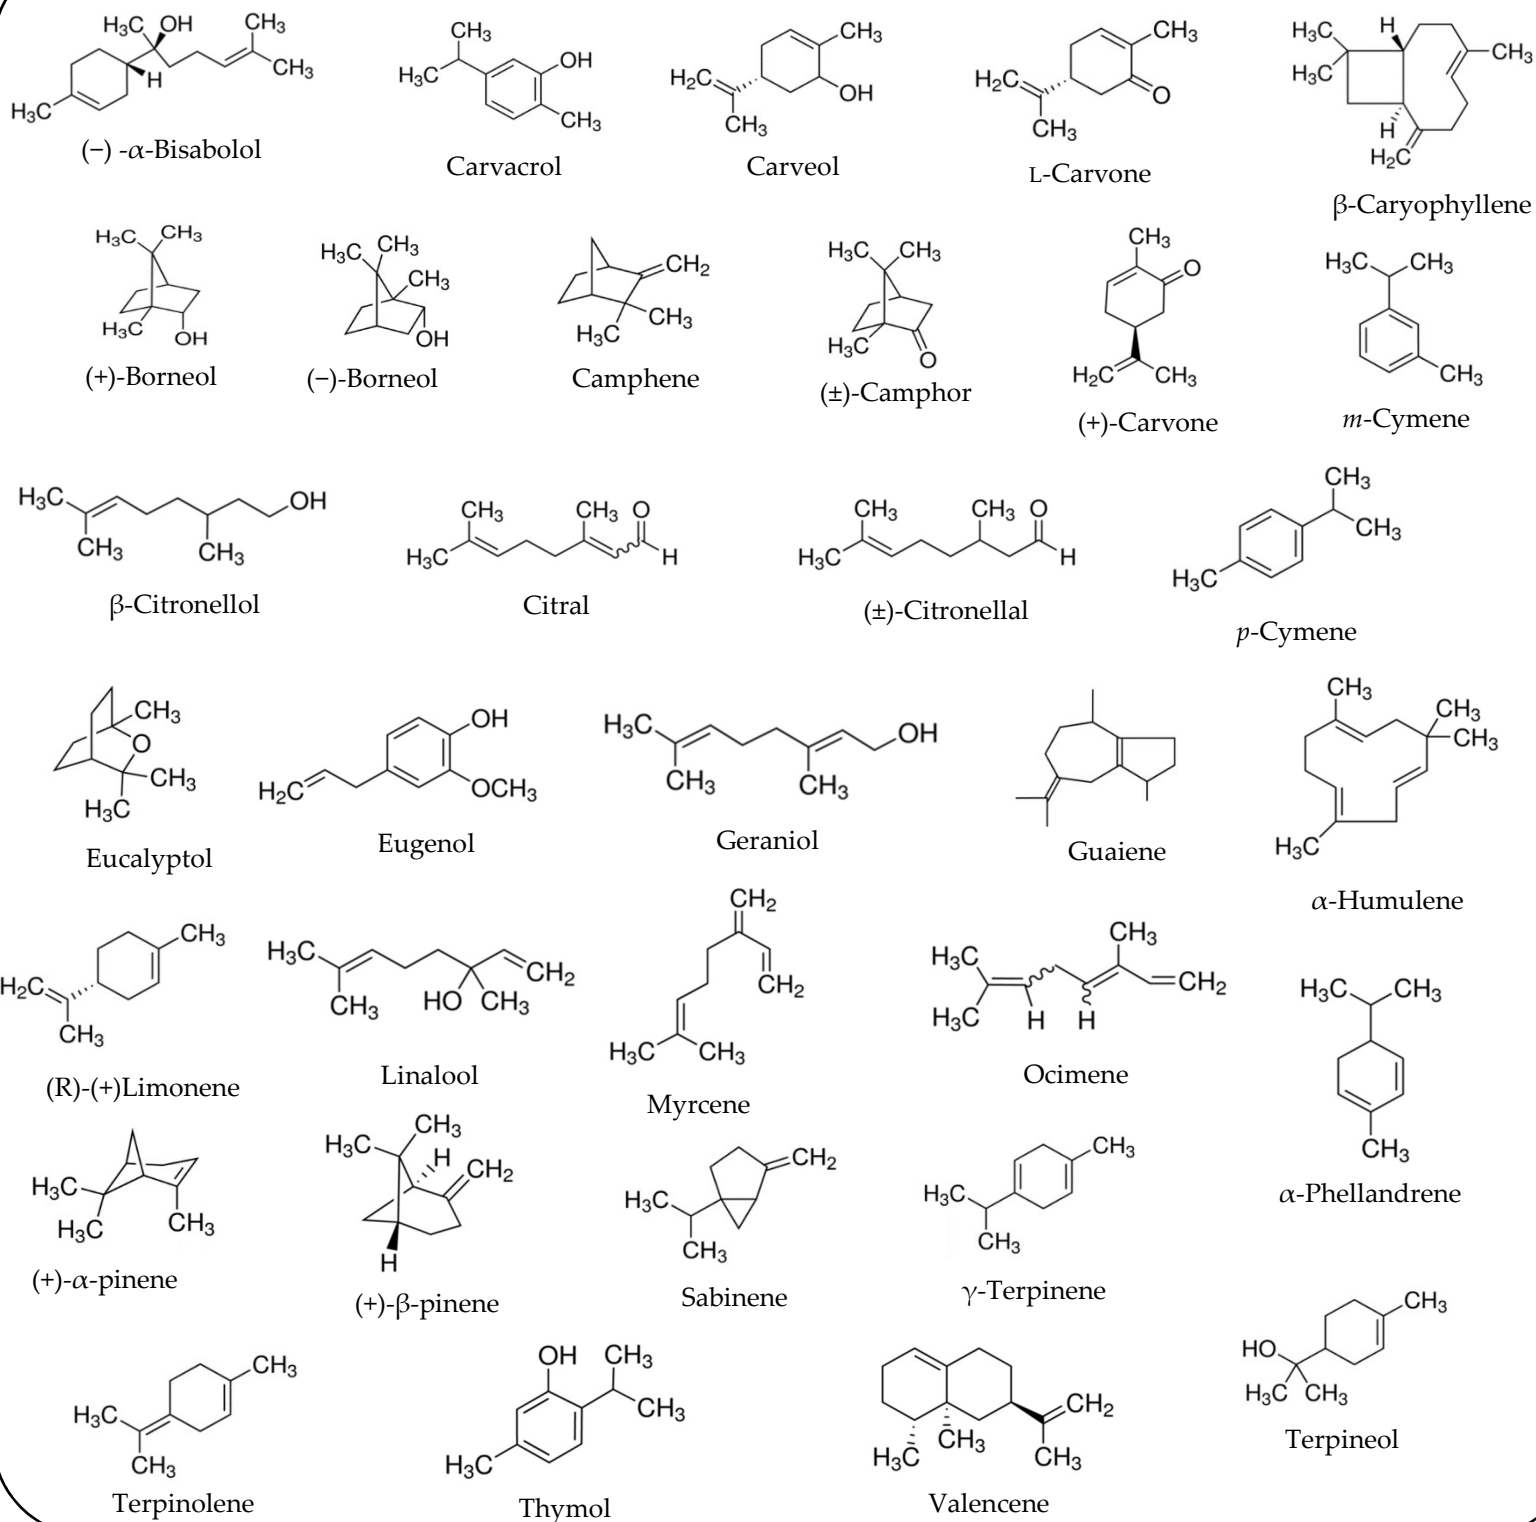

**Figure S1.** Structures list of the tested compounds.
